# Supplementary material for: Photochromic spiropyran-embedded PDMS for highly sensitive and tunable optochemical gas sensing
Source: Royal Society of Chemistry journal article supplement (doi:10.1039/c4cc00567h), 2014-01-01
Supplement: c4cc00567h1.pdf [file c4cc00567h1.pdf]

## Supplementary Information for

### Photochromic Spiropyran-Embedded PDMS for Highly Sensitive and Tunable Optochemical Gas Sensing

Yoon-Seung Nam<sup>a</sup>, Imsung Yoo<sup>b</sup>, Oktay Yarimaga<sup>a</sup>, In Sung Park<sup>a</sup>, Dong-Hoon Park<sup>a</sup>, Simon Song<sup>\*b,c</sup>, Jong-Man Kim<sup>\*a,c</sup> and Chan Woo Lee<sup>\*c</sup>

<sup>a</sup> Department of Chemical Engineering, Hanyang University, Seoul 133-791, Korea. E-mail: jmk@hanyang.ac.kr.

<sup>b</sup> Department of Mechanical Engineering, Hanyang University, Seoul 133-791, Korea. E-mail: simonsong@hanyang.ac.kr

<sup>c</sup> Institute of Nano Science and Technology, Hanyang University, Seoul 133-791, Korea. E-mail: lcw@hanyang.ac.kr

#### Experimental

A typical procedure for a spiropyran-embedded PDMS film preparation is as follows. A methylene chloride (0.1 mL) solution containing 10 mg of 1,3,3-trimethylindolino-6'-nitrobenzopyrylospiran (SP) (Sigma-Aldrich) was injected into a mixture (22 g) of PDMS elastomer base (Sylgard 184) and PDMS curing agent (DC184A, weight ratio = 10:1). After gentle shaking for 30 min, the mixture was poured into a petridish (diameter: 3.5 cm) and cured at 70 °C for 2 h to give a colorless film (thickness: 2.2 mm). The thickness of the film can be controlled by choosing a proper size of the dish.

The spiropyran containing PDMS microfluidic chip was fabricated using the following procedure. A PDMS prepolymer mixture was obtained by injecting methylene chloride solution (0.1 mL) of spiropyran (5 mg) into a mixture (11 g) of dimethylsiloxane and initiator (weight ratio = 10:1). After degassing in a vacuum chamber for 30 min, the mixture was poured onto the mold and cured in an oven at 70 °C for 2 h. The patterned PDMS substrate

was peeled from the mold, washed with isopropyl alcohol, and bonded to a glass slide. The chip was irradiated with 365 nm UV light for 3 min before use.

Fluorescent images were obtained using a fluorescence microscope (IX71, Olympus) with a 4x objective and a color charge-coupled device (CCD) camera (DP71, Manufacturer). The flow rates of the HCl gas were controlled by using a syringe pump (KDS120, KD Scientific).

### Pressure Calculation

Because Reynolds number for the HCl gas flow with a maximum flow rate of 5 mL/h is 2.1, all HCl flows are laminar and pressures at measurement points in the microchannel can be estimated by using the Poiseuille flow relationship,

$$\frac{\Delta p}{\Delta x} = \frac{8\mu}{\pi R^4} Q$$

where Q is the flow rate and  $\Delta x$  is the length (0.8 cm) between the measurement point to the outlet subject to atmospheric pressure. Also, R is the hydraulic radius (33.33  $\mu\text{m}$ ) and  $\mu$  is the viscosity of HCl gas (0.00014 g/cms). Table S1 shows pressures and effective diffusivities of HCl for six flow rates.

**Table S1**

| Flow rate (mL/h)                                   | 0     | 1      | 2      | 3      | 4      | 5      |
|----------------------------------------------------|-------|--------|--------|--------|--------|--------|
| Effective diffusivity ( $\mu\text{m}^2/\text{s}$ ) | 22.80 | 237.02 | 521.90 | 702.26 | 829.62 | 943.18 |
| Pressure (Pa)                                      | 0     | 64.2   | 128.4  | 192.6  | 256.8  | 321    |

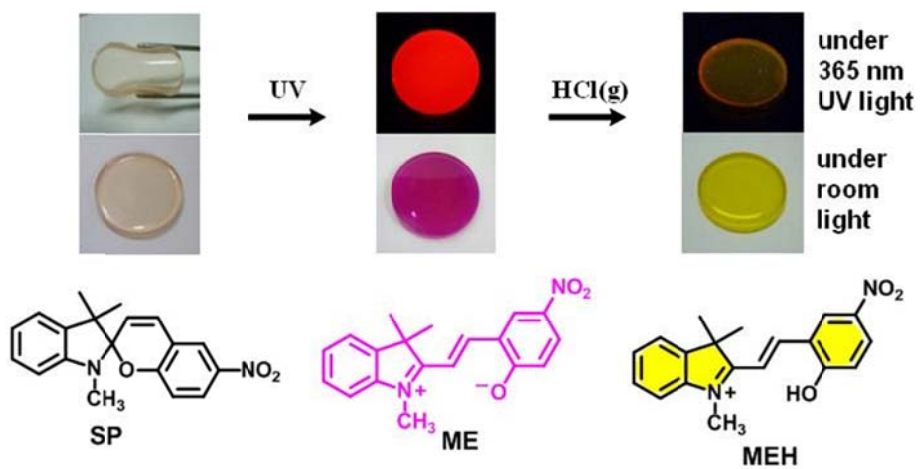

**Figure S1.** Color and fluorescence changes of a spiropyran-embedded PDMS film in response to UV and HCl(g).

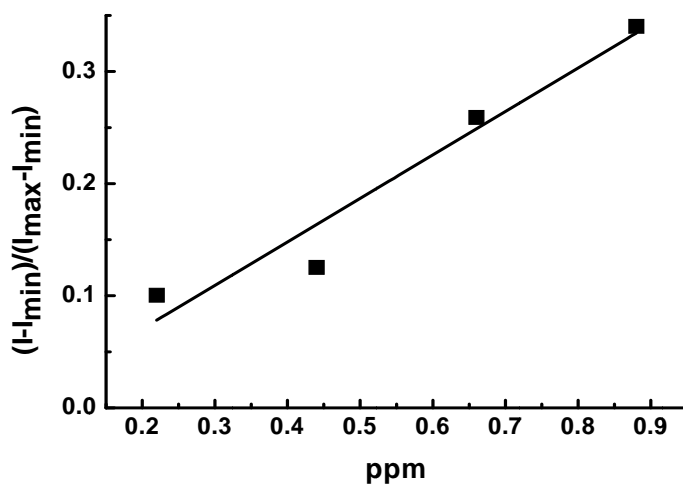

**Figure S2.** Plots yellow intensity of as a function of HCl concentration.

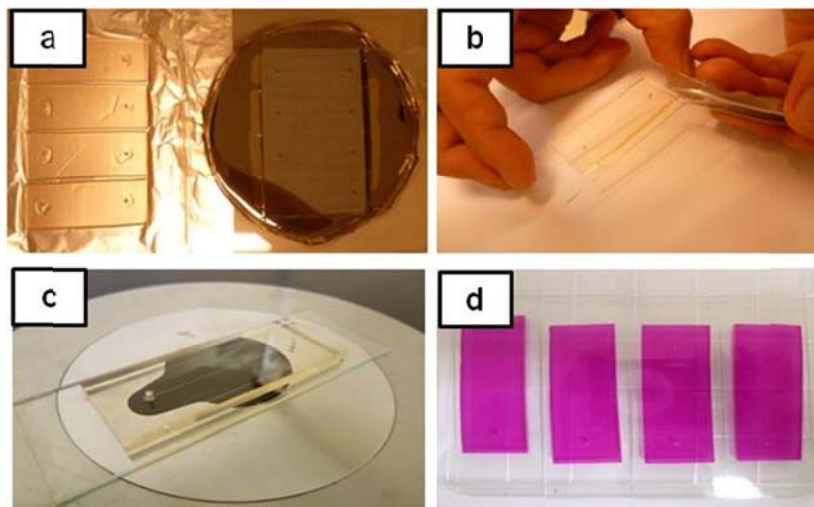

**Figure S3.** Preparation of a microfluidic chip with spiropyran-embedded PDMS substrates (a: spiropyran-containing PDMS molding, b: PDMS bonding to a glass substrate, c: a microfluidic chip before UV irradiation, d: microfluidic chips after 365 nm UV irradiation for 3 min ( $1 \text{ mW/cm}^2$ )).

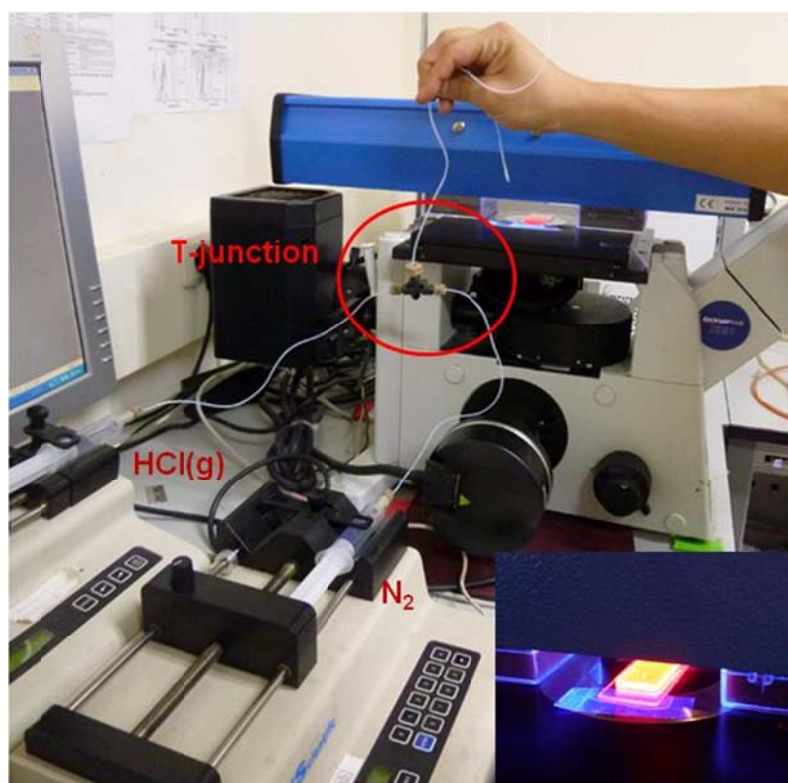

**Figure S4.** Experimental set-up.

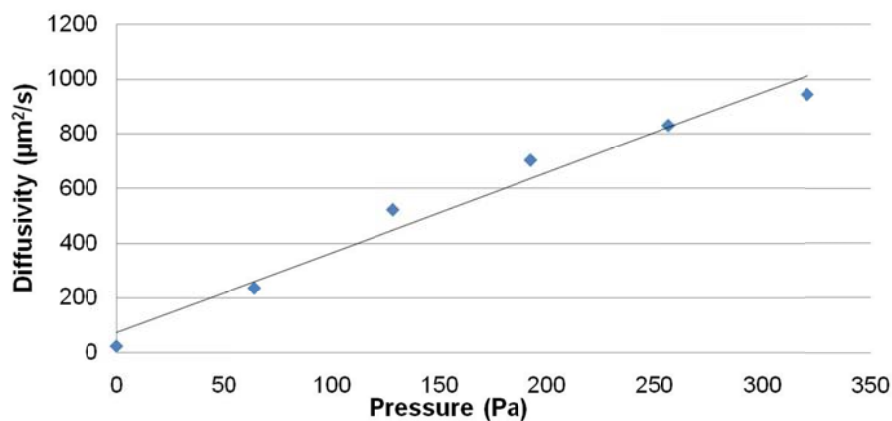

**Figure S5.** Plots of effective HCl diffusivity in spiropyran-embedded PDMS as a function of pressure. The line is a linear fit of the data.

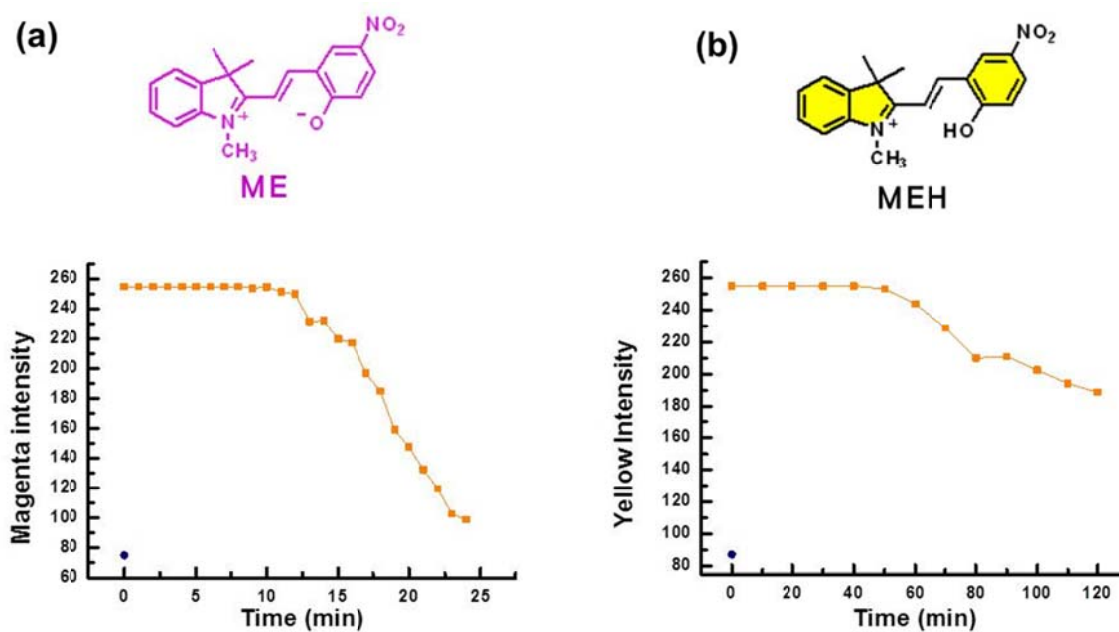

**Figure S6.** Plots of magenta (a) and yellow (b) intensity as a function of time for ME (a) and MEH (b) forms of the photochromic compound.

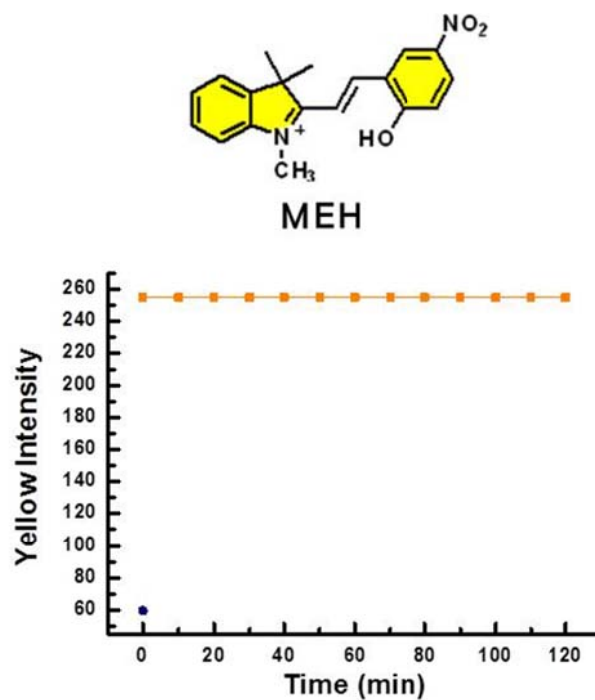

**Figure S7.** Plots of yellow intensity as a function of time for MEH form during 365 nm UV irradiation.

## References

- S1. J. M. Kim, E. K. Ji, S. M. Woo, H. Lee and D. J. Ahn, *Adv. Mater.*, 2003, **15**, 1118-1121.
